# Supplementary material for: Taxonomic position, antibiotic resistance and virulence factor production by Stenotrophomonas isolates from patients with cystic fibrosis and other chronic respiratory infections
Source: PubMed Central journal article supplement (PMC9097388; doi:10.1186/s12866-022-02466-5), 2022-05-12
Supplement: 12866_2022_2466_MOESM4_ESM.pdf [file 12866_2022_2466_MOESM4_ESM.pdf]

|        |                                                               |     |
|--------|---------------------------------------------------------------|-----|
| 543223 | PQPMVPGAVPTLSGEEDAGPGGNVIAFADPFLRHRARVRSMQIILVADDHEANRMVLQRL  | 494 |
| 533516 | PQPQVPGAVPSLSGDEGAGPGGNVIAFADPFLRHRARVRSMQIILVADDHEANRMVLQRL  | 530 |
|        | :       ***:               .. .*****:*****:*****:*****:*****  |     |
| 543220 | EKAGHKVTCVNGGAEVLDALDAQASYDAAIVDLHMPGMSGLDLLKQLRVMQASGMPYVPM  | 723 |
| 543211 | EKAGHKVTCVNGGAEVLDALDAQASYDAAIVDLHMPGMSGLDLLKQLRVMQASGMPYVPM  | 723 |
| 543223 | QKAGHRVLCVDGGEAVLDALADSEFDAVIVDLHMPGMSGLDMLKELRVMQAGGGPRTPVL  | 554 |
| 533516 | QKAGHRVLCVDGGEAVLDALADSEFDAVIVDLHMPGMSGLDMLKELRVMQAGGGPRTPVL  | 590 |
|        | :****:* **:* * ***** :.:**.******:***:*****.* * .**:          |     |
| 543220 | VLSADVTPEIILRCEQAGARAFILAKPVVATRLLEVLADVAANTRAEP--GIQSVPALPVG | 781 |
| 543211 | VLSADVTPEIILRCEQAGARAFILAKPVVATRLLEVLADVAANTRAEP--GIQSVPALPVG | 781 |
| 543223 | VLSADVTPEAIQRCTQAGAHAFILAKPVVAVRLLDTLAEIASNAQLRTMAAPVVRPAAPVQ | 614 |
| 533516 | VLSADVTPEAIQRCTQAGAHAFILAKPVVAVRLLDTLAEIASNAQLRTMAAPVVRPAAPLQ | 650 |
|        | *****:* * * *****:*****.***:*:**:***: . .       ** *:         |     |
| 543220 | DGVLDTAVLDELASLGMGDGFERKFIDQCLADVDASMGQLQGCGERQAWEDFREHAHALR  | 841 |
| 543211 | DGVLDTAVLDELASLGMGDGFERKFIDQCLADVDASMGQLQGCGERQAWEDFREHAHALR  | 841 |
| 543223 | DGVLDSVLDDELASLGMGEGFEREFIRQCLEDAASCWGKAEQAGETAQWEVFREQSHAIK  | 674 |
| 533516 | DGVLDSVLDDELASLGMGEGFEREFIRQCLEDVASCWGKAEQAGEAAHWDFREQSHAIK   | 710 |
|        | *****:*****:*****:* * * * . :.** : .** * : *****:***:         |     |
| 543220 | GVASNLGLVQVAASSGEIMRMADWQLKGEWSSRLGNLATALRNGRNALAARSAGAPHRDD  | 901 |
| 543211 | GVASNLGLVQVAASSGEIMRMADWQLKGEWSSRLGNLATALRNGRNALAARSAGAPHRDD  | 901 |
| 543223 | GVASNLGLMRASNRAGELMRMADWQLKAEWRVRLGVLQDAIKEGRRALDARAERRLRGAA  | 734 |
| 533516 | GVASNLGLMRASNRAGELMRMADWQLKTEWRTRLGILQEAIKEGRRALDARAERRMRGAA  | 770 |
|        | *****:.: : **:***** ** * * * * * :.:**.* ** * :       :       |     |
| 543220 | SERSPS                                                        | 907 |
| 543211 | SERSPS                                                        | 907 |
| 543223 | EDGE--                                                        | 738 |
| 533516 | DDGEAR                                                        | 776 |
|        | .: .                                                          |     |

## Supplementary figure 2.

Alignment of the RPF sensor protein. The four sequences represent the different gene clusters present in our strain collection.
